# Supplementary material
Source: Research Square preprint supplement (doi:10.21203/rs.3.rs-9041885/v1)
Supplement: Supplementary file 1 [file 2ce6003f4647c54d0989b2d8.xlsx]

## Sheet: Digital_Banking_Data
Country	Region	Year	Digital_Banking_Penetration	Account_Ownership	Digital_Payments_Usage	Access_to_Credit	Internet_Penetration	GDP_per_Capita	Education_Index
India	Asia	2022	0.62	0.78	0.65	0.45	0.55	2100	0.65
India	Asia	2023	0.68	0.82	0.71	0.48	0.6	2300	0.66
Kenya	Africa	2022	0.74	0.79	0.72	0.5	0.52	1900	0.6
Kenya	Africa	2023	0.78	0.83	0.76	0.54	0.57	2000	0.61
Brazil	Latin America	2022	0.66	0.8	0.68	0.52	0.7	9000	0.72
Brazil	Latin America	2023	0.71	0.84	0.74	0.57	0.74	9500	0.73
Indonesia	Asia	2022	0.58	0.7	0.6	0.42	0.5	4100	0.64
Indonesia	Asia	2023	0.63	0.75	0.66	0.46	0.55	4300	0.65
Nigeria	Africa	2022	0.49	0.55	0.48	0.3	0.45	2200	0.58
Nigeria	Africa	2023	0.54	0.6	0.52	0.34	0.48	2400	0.59
